# Supplementary material
Source: Copernicus journal article supplement (doi:10.5194/egusphere-2026-3223)
Supplement: Supplementary file 1 [file egusphere-2026-3223-supplement.pdf]

## Supporting Information for

### Freshwater forcing along the Indian Coastal Seas: Impacts on Productivity and Acidification

Kunal Madkaiker<sup>1</sup>, Ambarukhana D. Rao<sup>1</sup>, Vimlesh Pant<sup>1</sup>, Jonathan M. Lauderdale<sup>2</sup>

<sup>1</sup>Centre for Atmospheric Sciences, Indian Institute of Technology Delhi, New Delhi, India

<sup>2</sup>Department of Earth, Atmospheric and Planetary Sciences, Massachusetts Institute of Technology, Cambridge, Massachusetts, USA

Correspondence to: Kunal Madkaiker (Kunal.Ajit.Madkaiker@cas.iitd.ac.in)

#### Contents

Text S1-S2

Figure S1-S7

#### Text S1: Validation of model Sea Surface Salinity (SSS)

The modelled SSS from the CTRL run (Fig. S4a) is evaluated against satellite-based SMOS retrievals (Boutin et al., 2023) and gridded Argo salinity fields (Szekely et al., 2019). The model is regridded to match the resolution of the observational data for statistical comparison. It can be noted that the model is able to reproduce the large-scale salinity gradients across the study area. It can resolve the high saline waters in the AS and the relatively fresher conditions in the BoB, and captures the key hydrographic features driven by freshwater inputs. The bias comparisons (Fig. S4 b,c) reveal that the model performance is robust across most of the basin. This shows a low mean bias relative to both observations, particularly in the AS. However, a slight positive bias (~1 psu) is observed with SMOS, and a negative bias with Argo is observed along the northwestern BoB (NWBoB), highlighting the challenge of accurately representing riverine plumes across datasets. The RMSE remains below ~1 psu across most of the domain (Fig. S4e,f), indicating strong agreement between the model and observations. A higher RMSE is observed in the NWBoB.

A comparison of SSS frequency distributions (Fig. S4d) further supports the model's performance, showing a distinct bimodal structure that effectively separates the saline AS and the fresher BoB surface waters, a pattern also captured in both observational datasets. This bimodality arises from the regional contrasts maintained by evaporation-precipitation imbalances and substantial riverine discharge from the Ganga and Brahmaputra River systems (Behara and Vinayachandran, 2016). Overall, the validation of CTRL SSS confirms that the model reproduces both the spatial and temporal features of observed SSS across the study area, providing a reliable baseline for subsequent sensitivity experiments. A thorough validation of model-simulated temperature and currents has also been carried out and is detailed in Madkaiker et al. (2024).

37 **Text S2: Inter to intra-seasonal variability in subsurface density structure under freshwater**  
38 **forcing scenarios**

39 As seen in Fig. S7, a-e, the upper-ocean density exhibits a pronounced west-east gradient across  
40 the Indian coastal waters. The near-surface waters progressively freshen from the NAS towards  
41 the NWBoB, depicted by a gradual decrease in density. This spatial gradient primarily arises from  
42 the increasing freshwater influence associated with precipitation and riverine discharge (Behara  
43 and Vinayachandran, 2016; Vinayachandran et al., 2002).

44 In the NAS, the density field remains largely unaffected by freshwater perturbation. Across all  
45 SENS experiments, the pycnocline closely coincides with that of CTRL, and the seasonal vertical  
46 structure exhibits minimal variation. This insensitivity of freshwater forcing in this region shows  
47 the dominance of intense mixing and winter convection, plus the advent of high saline waters from  
48 the Persian Gulf (Prasanna Kumar et al., 2001). Therefore, the absence or enhancement of  
49 freshwater fluxes has a negligible impact on the upper-layer stability in the NAS. The NEAS  
50 exhibits slightly higher sensitivity. During the summer monsoon, when coastal runoff enhances  
51 near-surface stratification, the upper layers in CTRL become marginally fresher and less dense.  
52 In SENS1-S3, the absence of precipitation and runoff produces positive density anomalies ( $\sim 0.3$ -  
53  $0.5 \text{ kg m}^{-3}$ ) and a deepening of the pycnocline by  $\sim 10 \text{ m}$ , suggesting enhanced vertical mixing  
54 and weaker haline stratification. Conversely, under SENS4, excess freshwater flux induces a  
55 shallow, low-density surface layer extending up to  $40 \text{ m}$ , particularly between summer and winter.  
56 This response is consistent with earlier observations that the NEAS freshens seasonally due to  
57 alongshore freshwater transport and runoff (Shankar et al., 2015).

58 The influence of freshwater becomes more prominent in the SEAS and SWBoB regions. Both  
59 regions are influenced by strong monsoonal precipitation and the advection of low-salinity water  
60 carried by the East India Coastal Current (EICC), which transports freshwater plumes from the  
61 northern BoB to southward along the eastern Indian coast (Vinayachandran and Kurian, 2007).  
62 In the CTRL simulation, the pycnocline resides around  $60$ - $80 \text{ m}$  depth during spring and then  
63 shoals rapidly during the summer. In SENS1-S3, the absence of freshwater results in denser  
64 surface waters and a deepening of the pycnocline by  $20$ - $40 \text{ m}$ , particularly during fall and winter,  
65 indicating stronger vertical mixing and weaker stratification. Conversely, SENS4 shows a  
66 pronounced freshening (an increase in the density anomaly of up to  $\sim 1 \text{ kg m}^{-3}$ ) and a  $10 \text{ m}$   
67 shoaling of the pycnocline, demonstrating that enhanced freshwater increases stratification.

68 The NWBoB displays a significant response to freshwater forcing. This region is strongly  
69 influenced by extensive precipitation and river discharge from the Ganga-Brahmaputra River  
70 system (Papa et al., 2012). In CTRL, the pycnocline is consistent at  $\sim 80 \text{ m}$  during winter and  
71 spring, but shoals sharply to  $10 \text{ m}$  during fall. In SENS1-S3, where freshwater input is reduced or  
72 absent, the upper layer becomes denser by  $\sim 1$ - $1.5 \text{ kg m}^{-3}$ , and the pycnocline deepens by  $10$ - $30$   
73  $\text{m}$ , thereby reducing stratification through increased mixing. In contrast, SENS4 produces more  
74 freshening and shoaling between summer and fall seasons, increasing upper density by  $0.4 \text{ kg}$   
75  $\text{m}^{-3}$  and a shoaling of the pycnocline.

76 These results show how perturbations in freshwater forcing alter the density profiles in coastal  
 77 regions. It is to be noted that the density-driven buoyancy structure of SEAS, SWBoB and NWBoB  
 78 is more sensitive to freshwater variations than NAS or NEAS (Sengupta et al., 2016).

79

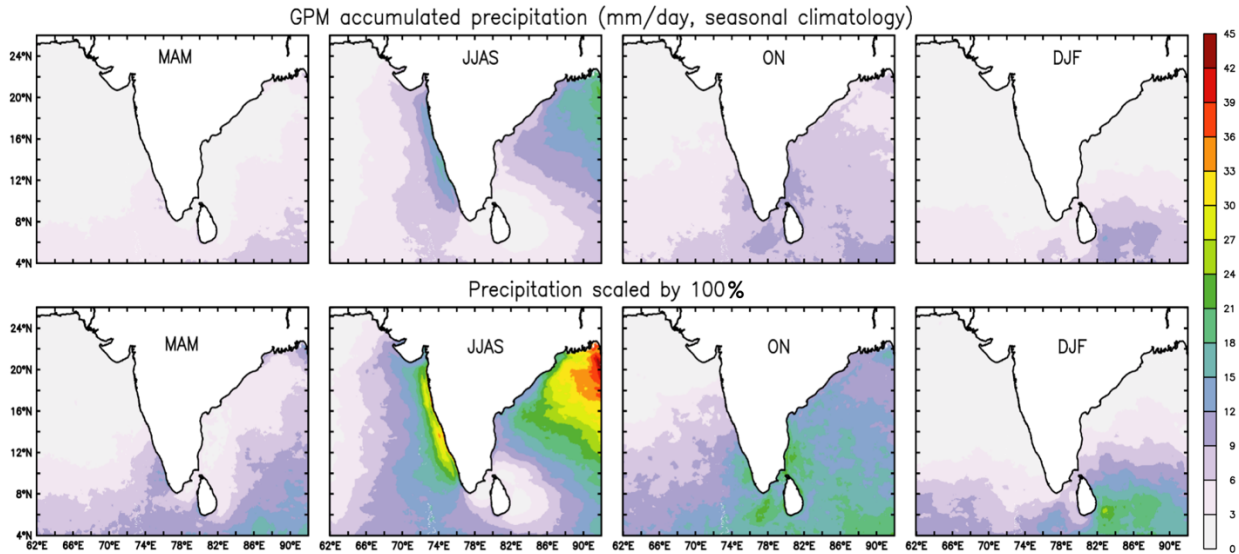

80  
 81 **Figure S1.** (Top panel) Seasonal climatology of accumulated precipitation over the study area,  
 82 based on GPM satellite measurements. (Bottom panel) GPM precipitation scaled by 100% for  
 83 experiment SENS4.  
 84

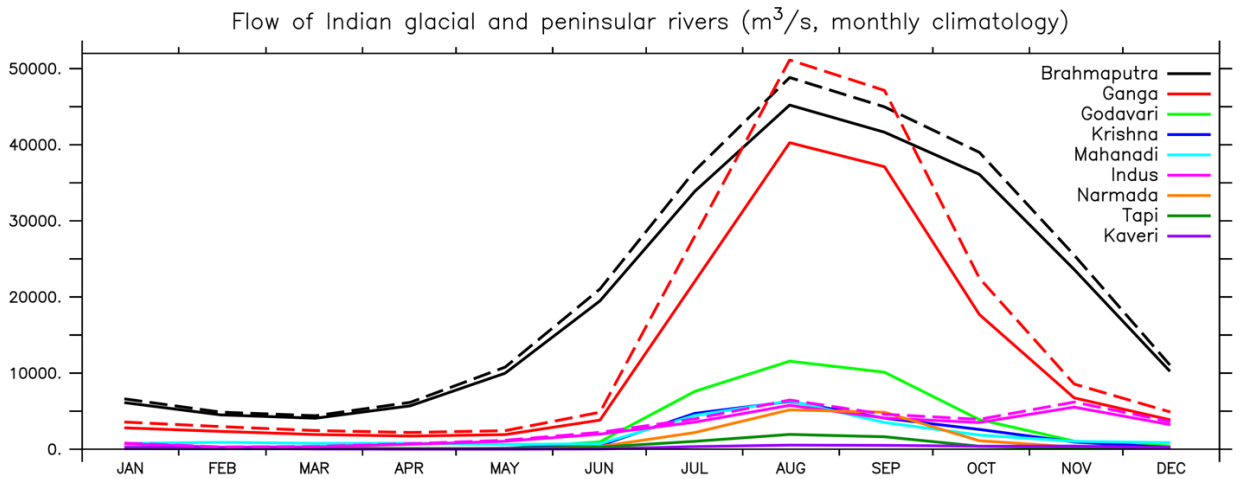

85  
 86 **Figure S2.** Major Indian glacial and peninsular rivers. Monthly climatological data are sourced  
 87 from Dai and Trenberth (2002). The three glacial rivers, shown with solid lines, are the  
 88 Brahmaputra (black), the Ganga (red), and the Indus (pink). The respective dashed lines, in the  
 89 same colours, indicate an increase in discharge of 8%, 27%, and 12%, respectively, based on  
 90 estimates from IPCC (2023) and Lutz et al. (2014) for experiment SENS4.  
 91

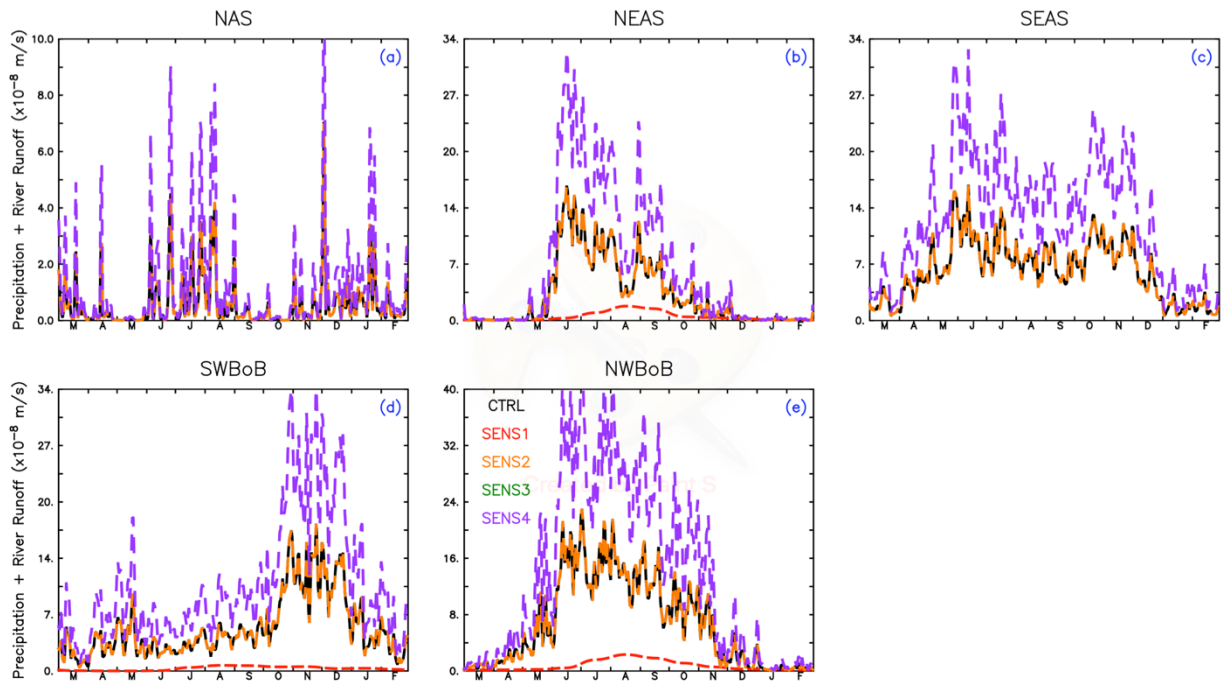

92  
 93 **Figure S3.** Climatological freshwater flux ( $\text{m}^3 \text{s}^{-1}$ ) prescribed to the model in the control (black line)  
 94 and sensitivity experiments (coloured lines). SENS1: no precipitation; SENS2: no runoff; SENS3:  
 95 no precipitation and runoff; and SENS4: increased precipitation and runoff. Each panel  
 96 corresponds to one of the five coastal regions considered along the Indian coastline. Note that  
 97 the y-axis ranges vary across panels.  
 98

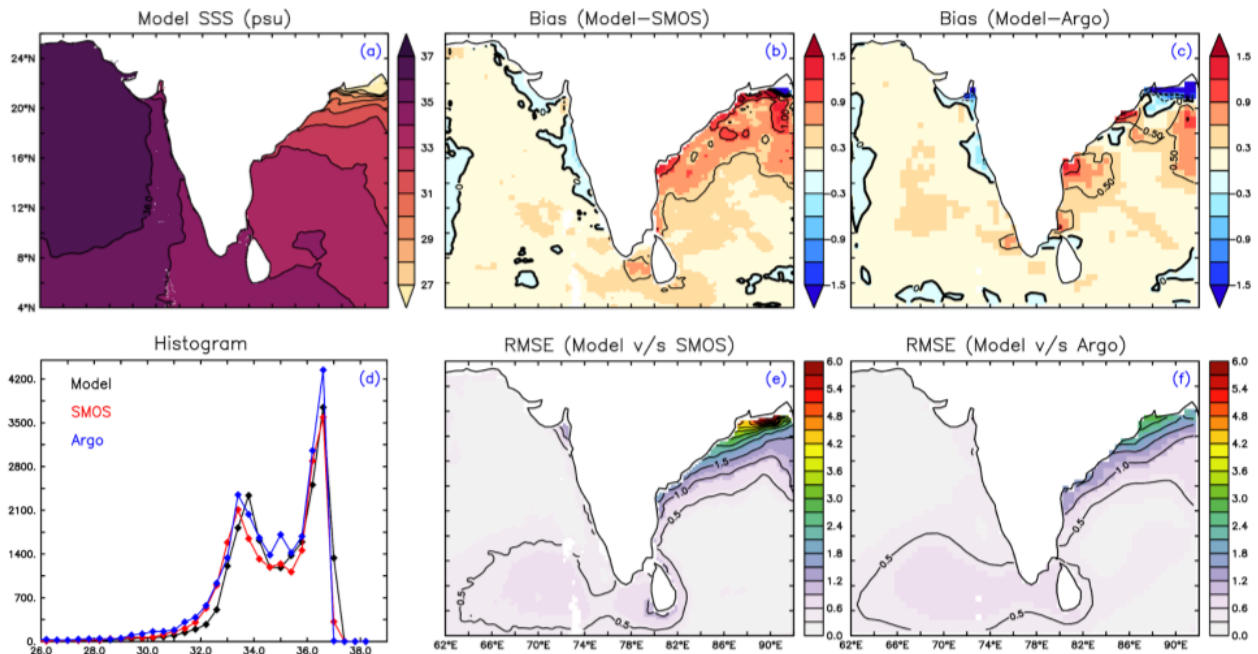

99  
 100 **Figure S4.** Comparison of (a) model SSS (CTRL experiment) with SMOS satellite and Argo  
 101 gridded products, showing spatial bias (b, c), histogram (d), and RMSE (e, f) over the study area.

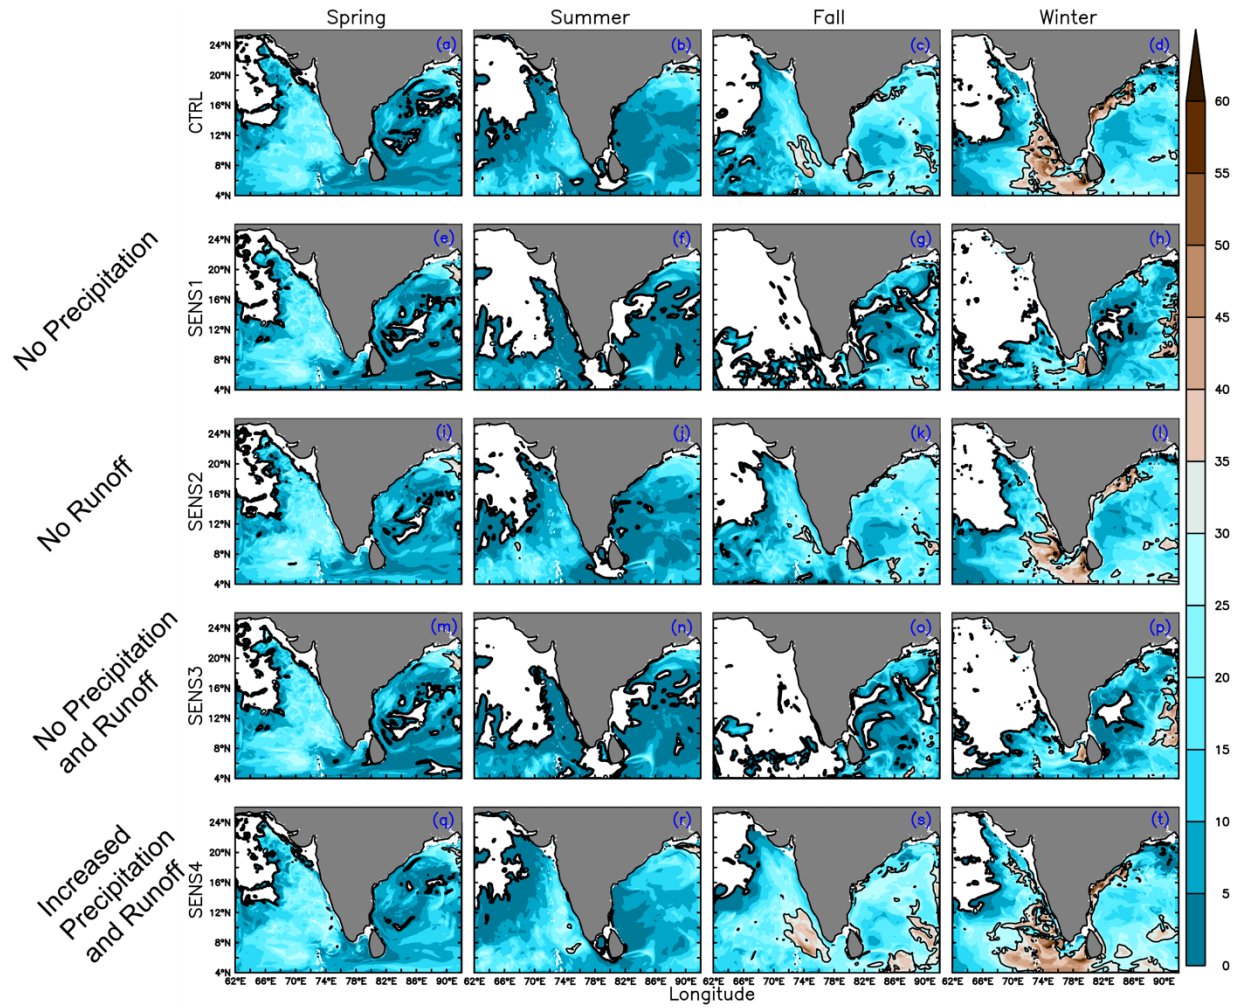

102  
 103  
 104  
 105

**Figure S5.** Seasonal climatology of BLT (in m) from (a-d) CTRL, followed by the SENS experiments (e-t), showing their spatial distribution. White colour indicates no BLT formation.

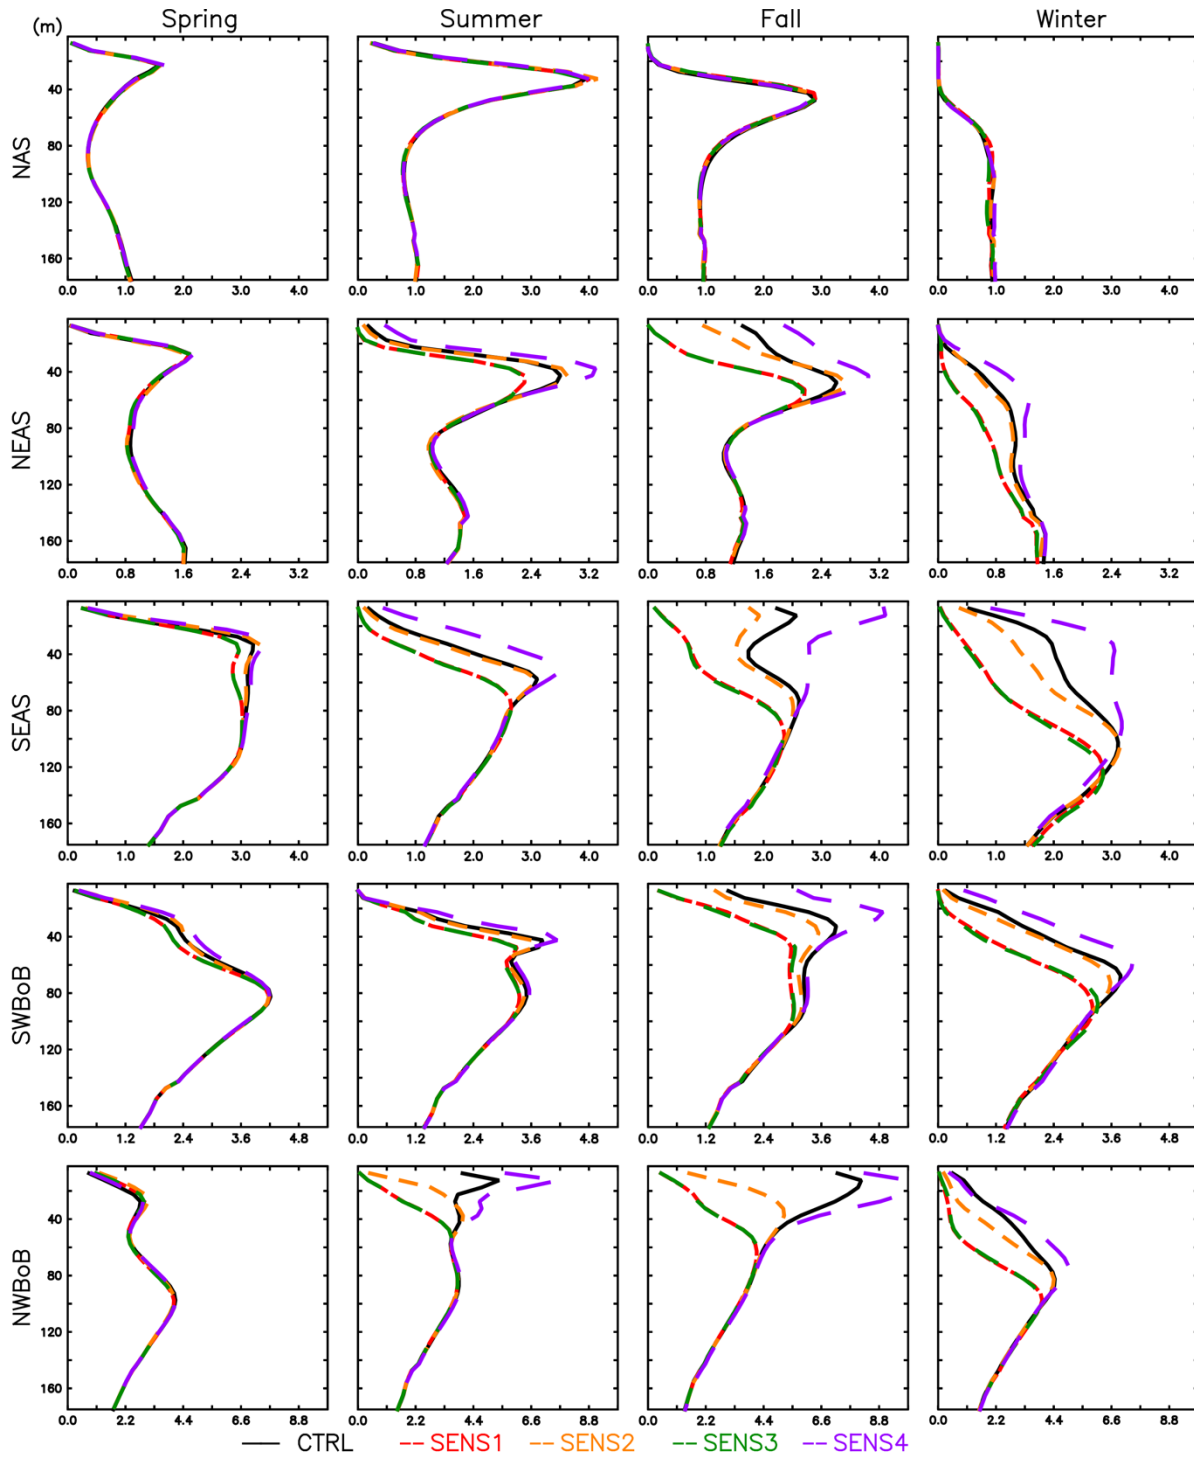

106  
 107  
 108

**Figure S6.** Seasonal vertical profiles of  $N^2$  ( $\times 10^{-4} \text{ s}^{-2}$ ) averaged over five coastal masks for CTRL and SENS experiments. Note that the x-axis ranges vary across panels.

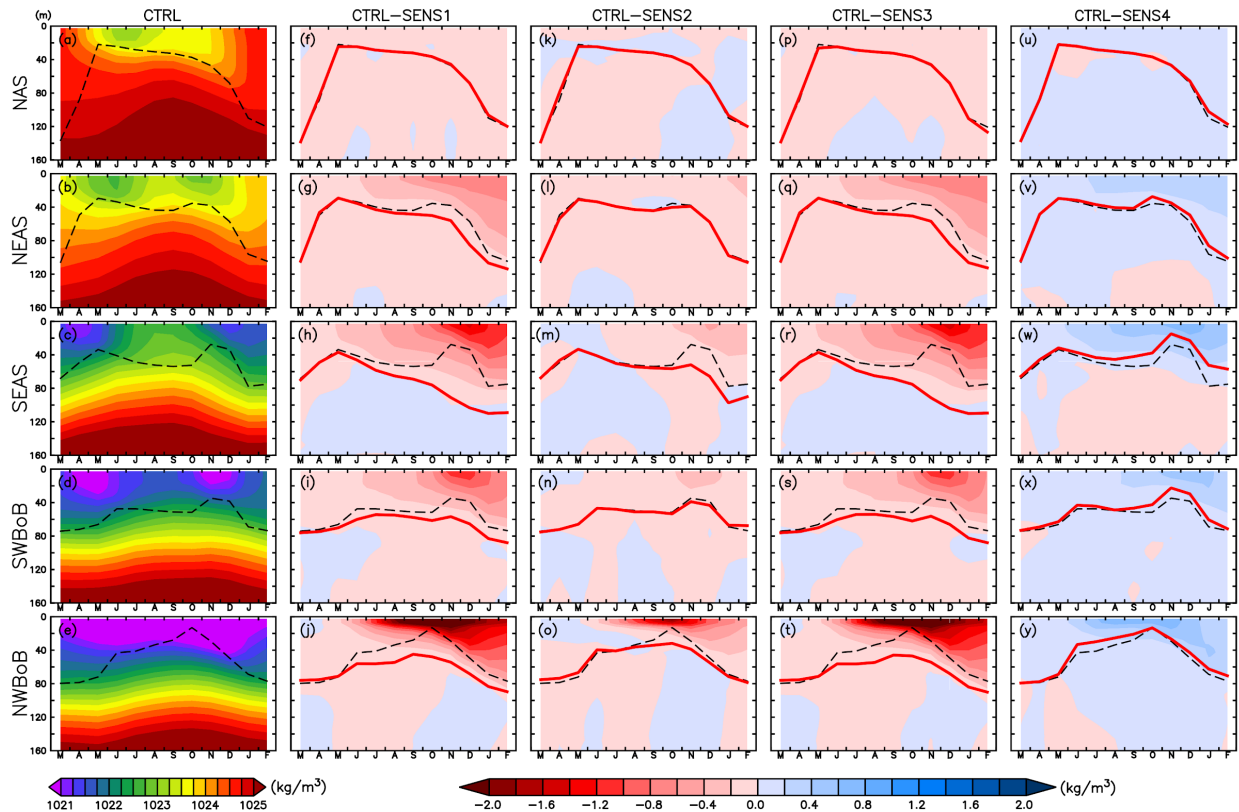

109

110 **Figure S7.** Monthly variability of subsurface density ( $\text{kg m}^{-3}$ ) in the upper 160 m averaged across  
 111 the five coastal masks. The first column shows the CTRL density structure, while subsequent  
 112 columns represent CTRL-SENS differences. Red shading indicates increased density in the  
 113 SENS runs relative to CTRL, whereas blue shading indicates a reduction. The dashed black line  
 114 denotes the CTRL pycnocline, and solid red lines indicate pycnocline depths in the SENS  
 115 experiments.

116

117 **Supplementary references:**

118 Behara, A. and Vinayachandran, P. N.: An OGCM study of the impact of rain and river water forcing on the  
 119 Bay of Bengal, *J. Geophys. Res. Oceans*, 121, <https://doi.org/10.1002/2015JC011325>, 2016.

120 Boutin Jacqueline, Vergely Jean-Luc, Khvorostyanov Dmitry, and Supply Alexandre: SMOS SSS L3 maps  
 121 generated by CATDS CEC LOCEAN. debias V8.0. SEANOE.,  
 122 <https://doi.org/https://doi.org/10.17882/52804>, 2023.

123 Dai, A. and Trenberth, K. E.: Estimates of freshwater discharge from continents: Latitudinal and seasonal  
 124 variations, *J. Hydrometeorol.*, 3, [https://doi.org/10.1175/1525-7541\(2002\)003<0660:EOFDFC>2.0.CO;2](https://doi.org/10.1175/1525-7541(2002)003<0660:EOFDFC>2.0.CO;2),  
 125 2002.

126 Intergovernmental Panel on Climate Change (IPCC): *Climate Change 2022 – Impacts, Adaptation and*  
 127 *Vulnerability*, Cambridge University Press, <https://doi.org/10.1017/9781009325844>, 2023.

- 128 Lutz, A. F., Immerzeel, W. W., Shrestha, A. B., and Bierkens, M. F. P.: Consistent increase in High Asia's  
129 runoff due to increasing glacier melt and precipitation, *Nat. Clim. Chang.*, 4, 587–592,  
130 <https://doi.org/10.1038/NCLIMATE2237>;TECHMETA, 2014.
- 131 Madkaiker, K., Rao, A. D., and Joseph, S.: High-resolution numerical modelling of seasonal volume,  
132 freshwater, and heat transport along the Indian coast, *Ocean Science*, 20, 1167–1185,  
133 <https://doi.org/10.5194/os-20-1167-2024>, 2024.
- 134 Papa, F., Bala, S. K., Pandey, R. K., Durand, F., Gopalakrishna, V. V., Rahman, A., and Rossow, W. B.:  
135 Ganga-Brahmaputra river discharge from Jason-2 radar altimetry: An update to the long-term satellite-  
136 derived estimates of continental freshwater forcing flux into the Bay of Bengal, *J. Geophys. Res. Oceans*,  
137 117, <https://doi.org/10.1029/2012JC008158>, 2012.
- 138 Prasanna Kumar, S., Ramaiah, N., Gauns, M., Sarma, V. V. S. S., Muraleedharan, P. M., Raghukumar, S.,  
139 Dileep Kumar, M., and Madhupratap, M.: Physical forcing of biological productivity in the Northern Arabian  
140 Sea during the Northeast Monsoon, *Deep Sea Research Part II: Topical Studies in Oceanography*, 48,  
141 1115–1126, [https://doi.org/10.1016/S0967-0645\(00\)00133-8](https://doi.org/10.1016/S0967-0645(00)00133-8), 2001.
- 142 Sengupta, D., Bharath Raj, G. N., Ravichandran, M., Sree Lekha, J., and Papa, F.: Near-surface salinity  
143 and stratification in the north Bay of Bengal from moored observations, *Geophys. Res. Lett.*, 43,  
144 <https://doi.org/10.1002/2016GL068339>, 2016.
- 145 Shankar, D., Remya, R., Vinayachandran, P. N., Chatterjee, A., and Behera, A.: Inhibition of mixed-layer  
146 deepening during winter in the northeastern Arabian Sea by the West India Coastal Current, *Climate  
147 Dynamics* 2015 47:3, 47, 1049–1072, <https://doi.org/10.1007/S00382-015-2888-3>, 2015.
- 148 Szekely, T., Gourrion, J., Pouliquen, S., and Reverdin, G.: The CORA 5.2 dataset for global in situ  
149 temperature and salinity measurements: Data description and validation, *Ocean Science*, 15,  
150 <https://doi.org/10.5194/os-15-1601-2019>, 2019.
- 151 Vinayachandran, P. N. and Kurian, J.: Hydrographic observations and model simulation of the Bay of  
152 Bengal freshwater plume, *Deep. Sea. Res. 1. Oceanogr. Res. Pap.*, 54,  
153 <https://doi.org/10.1016/j.dsr.2007.01.007>, 2007.
- 154 Vinayachandran, P. N., Murty, V. S. N., and Babu, V. R.: Observations of barrier layer formation in the Bay  
155 of Bengal during summer monsoon, *J. Geophys. Res. Oceans*, 107, SRF 19-1,  
156 <https://doi.org/10.1029/2001JC000831>, 2002.
